# Supplementary material for: Vitamin D-Binding Protein, Bioavailable, and Free 25(OH)D, and Mortality: A Systematic Review and Meta-Analysis
Source: MDPI journal article supplement (doi:10.3390/nu14193894), 2022-09-20
Supplement: s1 [file s1]

## **Supplementary materials**

**Supplemental Table S1.** Search strategy in PubMed and Web of Science.

**Supplemental Table S2.** Risk of bias assessment for eligible studies by using Newcastle-Ottawa Scale.

**Supplemental Figure S1.** Funnel plots for evaluating potential publication bias for associations of VDBP, total, bioavailable, and free 25(OH)D with all-cause mortality.

**Supplemental Figure S2.** Funnel plots for evaluating potential publication bias for associations of VDBP, total, bioavailable, and free 25(OH)D with cancer mortality.

**Supplemental Table S1. Search strategy in PubMed and Web of Science.**

|                         |                                                                                                                                                                                                                                                                                                                                                                                                                                                                                                                                                                                                                                                                                                        |
|-------------------------|--------------------------------------------------------------------------------------------------------------------------------------------------------------------------------------------------------------------------------------------------------------------------------------------------------------------------------------------------------------------------------------------------------------------------------------------------------------------------------------------------------------------------------------------------------------------------------------------------------------------------------------------------------------------------------------------------------|
| 1. Vitamin D biomarkers | MeSH: Vitamin D Binding Protein OR Vitamin D-Binding Protein<br>OR All Fields: "vitamin D binding protein" OR "vitamin D-binding protein" OR "VDBP" OR "gc-globulin" OR "bioavailable 25-hydroxyvitamin D" OR "bio-available 25-hydroxyvitamin D" OR "bio-available 25(OH)D" OR "bioavailable 25(OH)D" OR "bioavailable 25(OH) vitamin D" OR "bio-available 25 (OH) vitamin D" OR "bioavailable vitamin D" OR "bio-available vitamin D" OR "bioavailability of vitamin D" OR "vitamin D bioavailability" OR "free 25-hydroxyvitamin D" OR "free 25(OH)D" OR "free 25(OH) vitamin D" OR "free vitamin D" OR "albumin-bound 25-hydroxyvitamin D" OR "albumin-bound 25(OH)D" OR "albumin-bound vitamin D" |
| 2.Mortality             | MeSH: Mortality OR Survival OR Death<br>OR All Fields: "mortality" OR "survival" OR "death" OR "deaths"                                                                                                                                                                                                                                                                                                                                                                                                                                                                                                                                                                                                |
| 3.Dates                 | Inception-2022/05/27                                                                                                                                                                                                                                                                                                                                                                                                                                                                                                                                                                                                                                                                                   |

Footnotes: MeSH terms were only used for systematic search in PubMed.

**Supplemental Table S2. Risk of bias assessment for eligible studies by using Newcastle-Ottawa Scale.**

| Study                 | Selection                                |                                     |                           |                                                                          | Comparability                                                   | Outcome               |                                                 |                                  | Total score |
|-----------------------|------------------------------------------|-------------------------------------|---------------------------|--------------------------------------------------------------------------|-----------------------------------------------------------------|-----------------------|-------------------------------------------------|----------------------------------|-------------|
|                       | Representativeness of the exposed cohort | Selection of the non-exposed cohort | Ascertainment of exposure | Demonstration that outcome of interest was not present at start of study | Comparability of cohorts on the basis of the design or analysis | Assessment of outcome | Was follow-up long enough for outcomes to occur | Adequacy of follow up of cohorts |             |
| General population    |                                          |                                     |                           |                                                                          |                                                                 |                       |                                                 |                                  |             |
| Dejaeger 2021 [11]    | 1                                        | 1                                   | 1                         | 1                                                                        | 2                                                               | 1                     | 1                                               | 1                                | 9           |
| Zhu 2022 [12]         | 1                                        | 1                                   | 1                         | 1                                                                        | 2                                                               | 1                     | 1                                               | 1                                | 9           |
|                       |                                          |                                     |                           |                                                                          |                                                                 |                       |                                                 |                                  |             |
| Cancer patients       |                                          |                                     |                           |                                                                          |                                                                 |                       |                                                 |                                  |             |
| Yang 2017 [13]        | 1                                        | 1                                   | 1                         | 1                                                                        | 1                                                               | 1                     | 1                                               | 0                                | 7           |
| Yuan 2020 [14]        | 1                                        | 1                                   | 1                         | 1                                                                        | 2                                                               | 1                     | 1                                               | 1                                | 9           |
| Fang 2020 [15]        | 1                                        | 1                                   | 1                         | 1                                                                        | 2                                                               | 1                     | 1                                               | 0                                | 8           |
| Turner 2013 [16]      | 1                                        | 1                                   | 1                         | 1                                                                        | 1                                                               | 1                     | 1                                               | 0                                | 7           |
| Anic 2014 [17]        | 1                                        | 1                                   | 1                         | 1                                                                        | 2                                                               | 1                     | 1                                               | 0                                | 8           |
| Peng 2022 [18]        | 1                                        | 1                                   | 1                         | 1                                                                        | 2                                                               | 1                     | 0                                               | 1                                | 8           |
| Chen 2020 [19]        | 1                                        | 1                                   | 1                         | 1                                                                        | 1                                                               | 1                     | 0                                               | 0                                | 6           |
|                       |                                          |                                     |                           |                                                                          |                                                                 |                       |                                                 |                                  |             |
| Other patients        |                                          |                                     |                           |                                                                          |                                                                 |                       |                                                 |                                  |             |
| Yu 2018 [20]          | 1                                        | 1                                   | 1                         | 1                                                                        | 2                                                               | 1                     | 1                                               | 0                                | 8           |
| Persson 2015 [21]     | 1                                        | 1                                   | 1                         | 1                                                                        | 2                                                               | 1                     | 1                                               | 1                                | 9           |
| Subramanian 2022 [22] | 1                                        | 1                                   | 1                         | 1                                                                        | 1                                                               | 1                     | 0                                               | 0                                | 6           |

Footnotes: The studies were listed based on ICD-10 codes of diseases among the participants.

**Supplemental Figure S1. Funnel plots for evaluating potential publication bias for associations of VDBP, total, bioavailable, and free 25(OH)D with all-cause mortality.**

**VDBP**

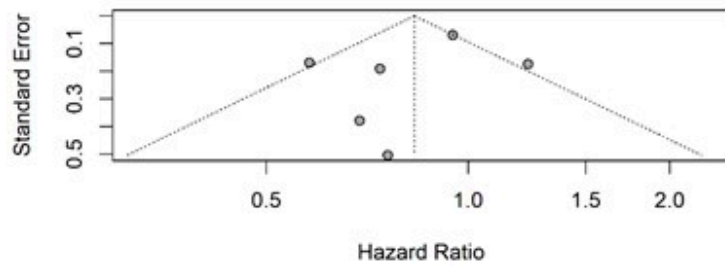

**Total 25(OH)D**

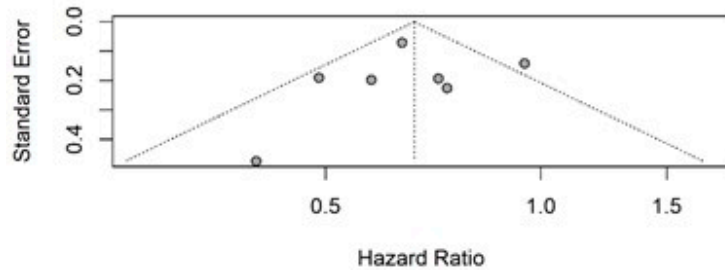

**Bioavailable 25(OH)D**

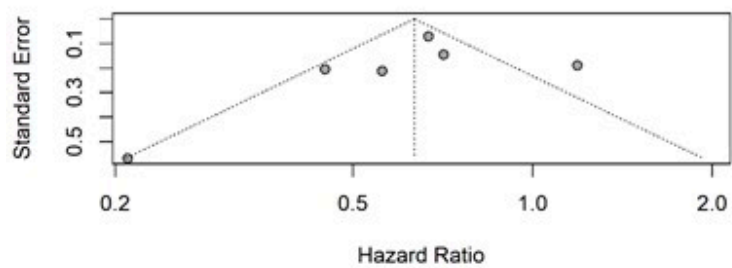

**Free 25(OH)D**

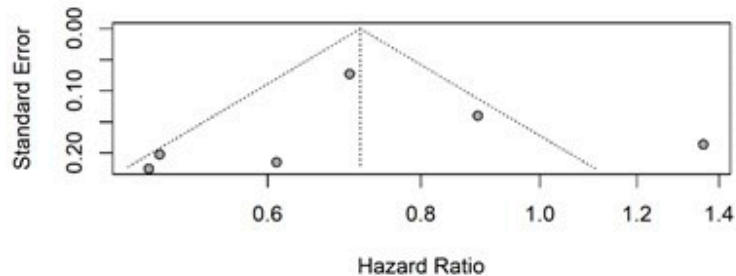

Abbreviations: VDBP: vitamin D-binding protein.

**Supplemental Figure S2. Funnel plots for evaluating potential publication bias for associations of VDBP, total, bioavailable, and free 25(OH)D with cancer mortality.**

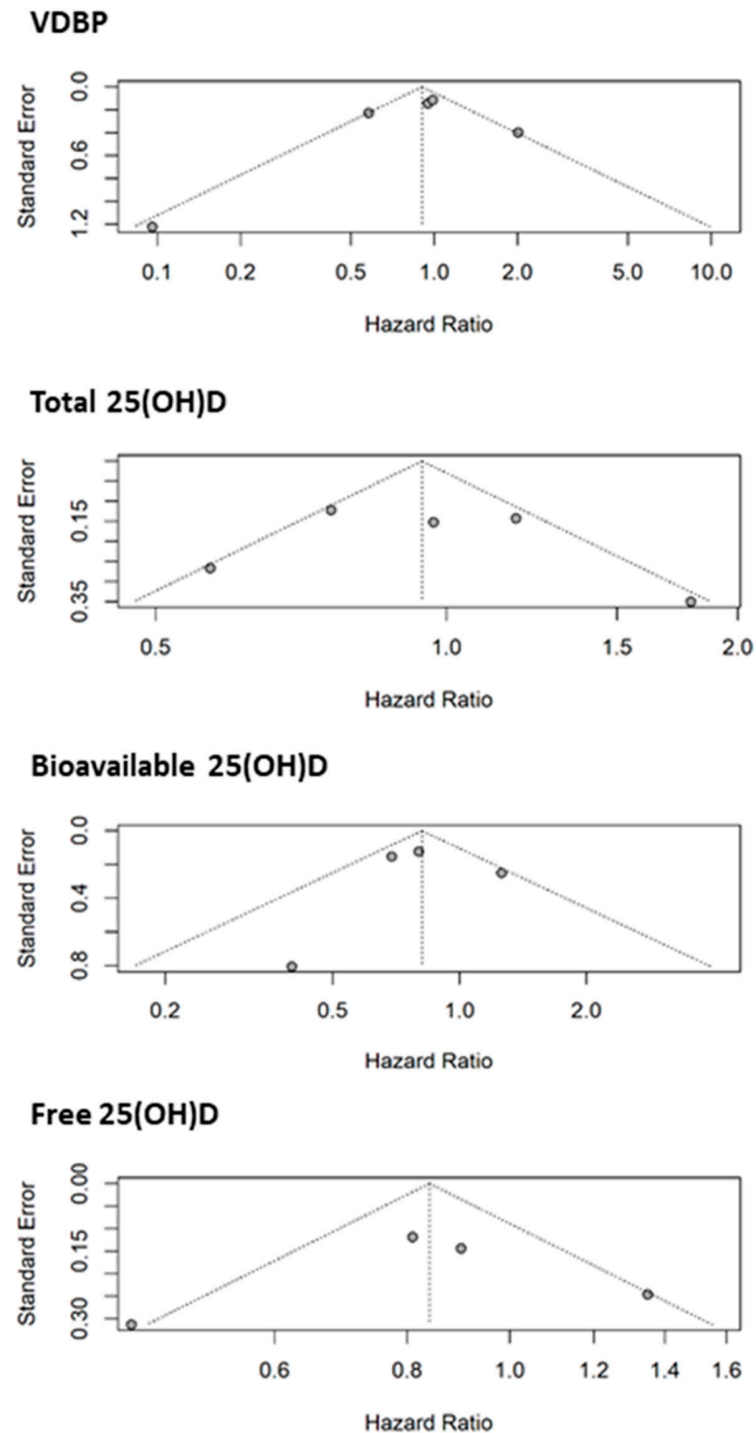

Abbreviations: VDBP: vitamin D-binding protein.
